# Supplementary material for: Isolation of Extracellular Vesicles from Human Follicular Fluid: Size-Exclusion Chromatography versus Ultracentrifugation
Source: MDPI journal article supplement (doi:10.3390/biom13020278), 2023-02-02
Supplement: s1 [file s1]

## Supplementary material

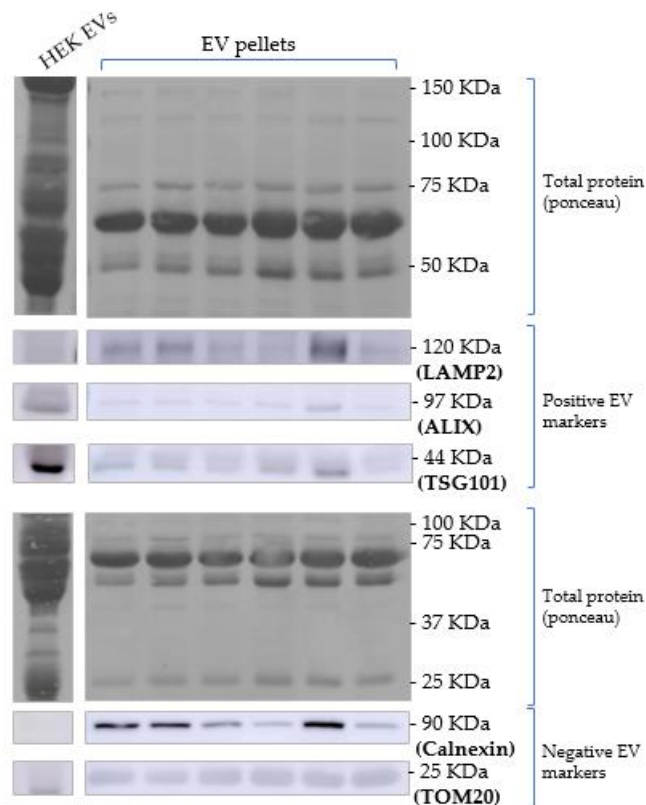

**Figure S1 Representative image of western blot membrane of UC pellets showing positive and negative EV markers and the respective ponceau staining.** A control lane was added to depict the positive and negative markers as well as the total protein pattern of EVs isolated from HEK cells.

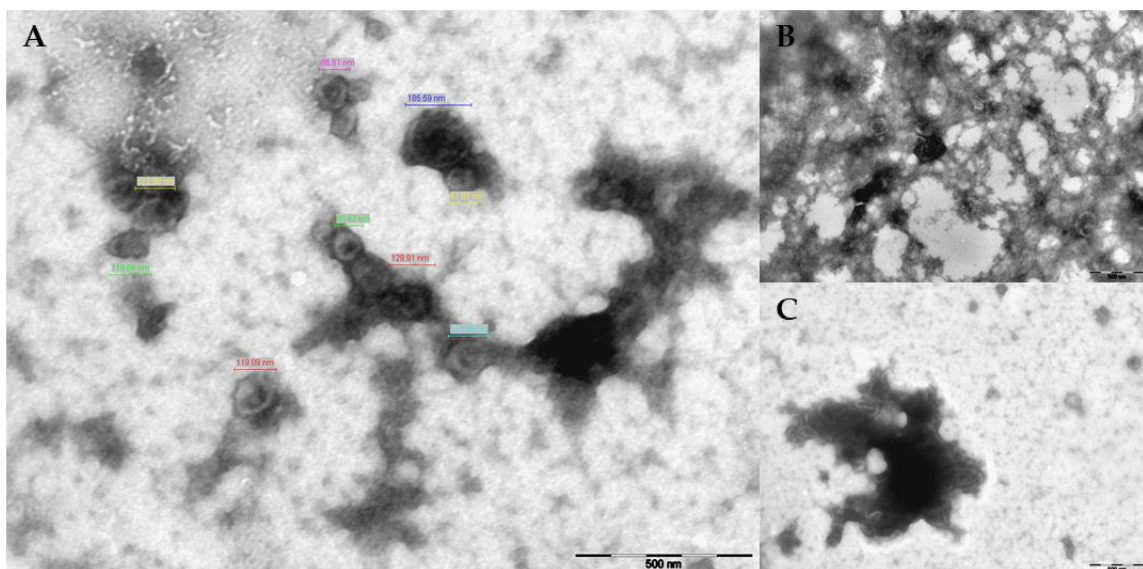

**Figure S2 Representative images of EVs isolated through UC obtained by transmission electron microscopy (TEM).** (A) TEM image exhibiting diameters measurement showing that the EV particles size range from 80.42 nm to 185.59 nm. (B) Representative TEM image of the protein mesh contamination; (C) Representative TEM image of large EV aggregates.

**Table S3 Total protein of 30 SEC fractions of FF from 4 independent biological samples quantified by microBCA.**

|     | FF1 (mg/mL) | FF2 (mg/mL) | FF3 (mg/mL) | FF4 (mg/mL) |
|-----|-------------|-------------|-------------|-------------|
| F7  | 0           | 0           | 0           | 0           |
| F8  | 0           | 0           | 0.004717    | 0           |
| F9  | 0.001325    | 0.015428    | 0.050468    | 0.007697    |
| F10 | 0.019986    | 0.045011    | 0.084156    | 0.034759    |
| F11 | 0.033007    | 0.055438    | 0.09622     | 0.046756    |
| F12 | 0.060682    | 0.092524    | 0.158133    | 0.054396    |
| F13 | 0.181768    | 0.301958    | 0.515494    | 0.116247    |
| F14 | 0.856964    | 0.926183    | 1.447908    | 0.358885    |
| F15 | 1.872074    | 2.219889    | 2.986864    | 0.892581    |
| F16 | 3.769814    | 4.581325    | 5.194778    | 2.50209     |
| F17 | 6.031287    | 5.892999    | 7.675836    | 4.22907     |
| F18 | 8.614322    | 8.308743    | 10.94218    | 6.85451     |
| F19 | 9.289074    | 8.308743    | 13.11026    | 8.75903     |
| F20 | 10.31175    | 7.836918    | 11.70471    | 8.76979     |
| F21 | 10.47516    | 7.596287    | 10.66335    | 10.60437    |
| F22 | 9.810953    | 6.728129    | 8.563554    | 9.80275     |
| F23 | 8.804096    | 4.916321    | 9.126914    | 9.51761     |
| F24 | 6.700768    | 4.175556    | 5.024063    | 8.18337     |
| F25 | 5.377621    | 3.080922    | 5.889019    | 5.893985    |
| F26 | 4.10719     | 1.943823    | 2.986864    | 4.245015    |
| F27 | 2.794586    | 1.330451    | 1.999887    | 3.462225    |
| F28 | 1.808816    | 0.537785    | 1.186145    | 2.273245    |
| F29 | 1.102435    | 0.3349      | 0.207379    | 1.428585    |
| F30 | 0.643814    | 0           | 0.275665    | 0.941695    |

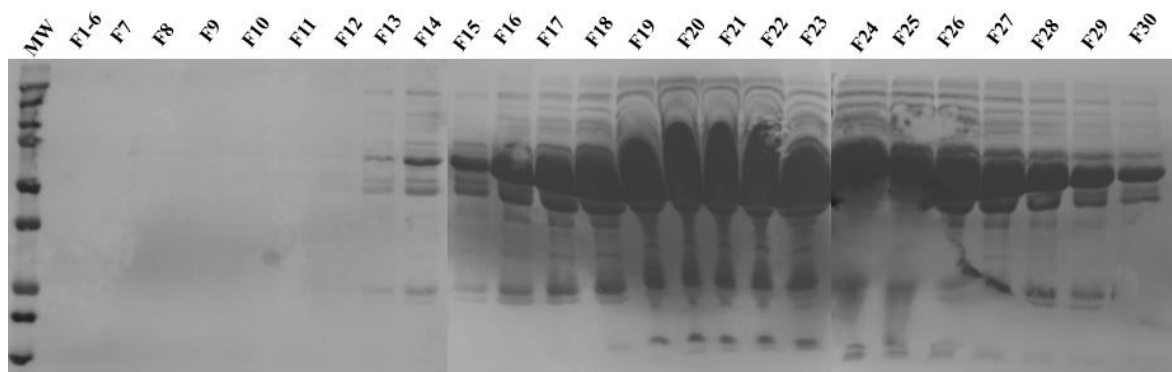

**Figure S4 Representative ponceau staining of the 30 SEC eluted fractions.**

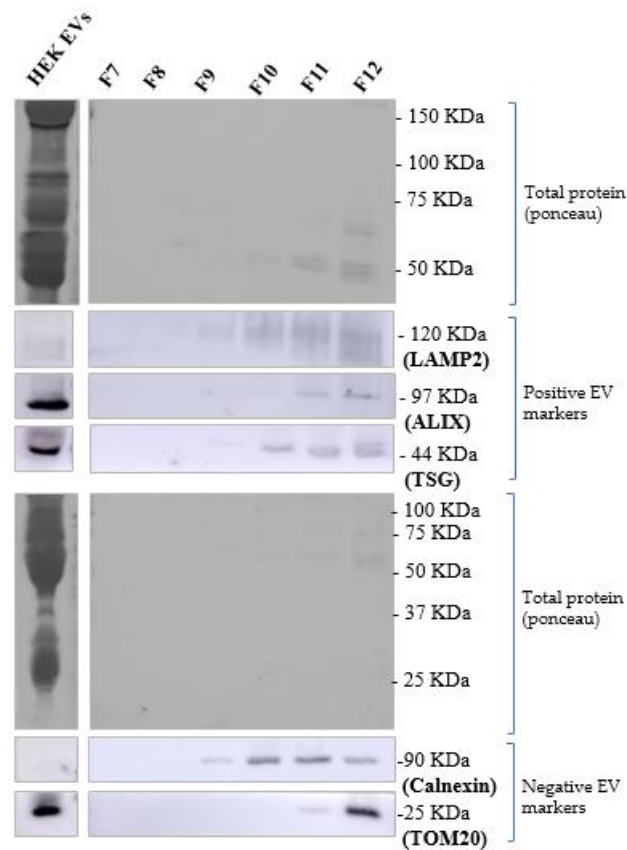

**Figure S5** Representative image of western blot membrane of SEC fractions 7 to 12 showing positive and negative EV markers and the respective ponceau staining. A control lane was added to depict the positive and negative markers as well as the total protein pattern of EVs isolated from HEK cells.

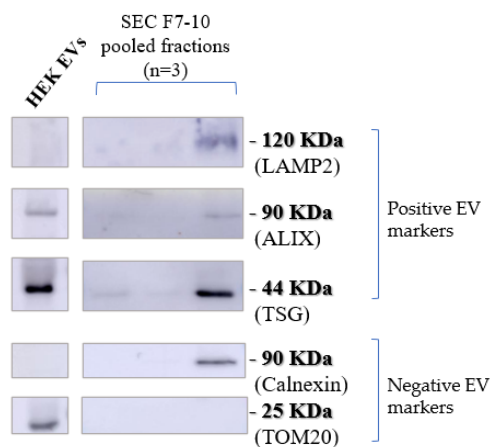

**Figure S6** Representative image of western blot membrane of EV-enriched SEC fractions showing positive and negative EV markers. A control lane was added to depict the positive and negative markers of EVs isolated from HEK cells.
